1           **An Annotated Multi-Site and Multi-Contrast Magnetic Resonance**  
2           **Imaging Dataset for the study of the Human Tongue Musculature**

3           Fernanda L. Ribeiro<sup>1\*</sup>, Xiangyun Zhu<sup>1,2</sup>, Xincheng Ye<sup>1</sup>, Sicong Tu<sup>3,4</sup>, Shyuan T.  
4           Ngo<sup>5,6</sup>, Robert D. Henderson<sup>7,5</sup>, Frederik J. Steyn<sup>5,8</sup>, Matthew C. Kiernan<sup>3,9</sup>, Markus  
5           Barth<sup>1,10,11,12</sup>, Steffen Bollmann<sup>1,10</sup>, Thomas B. Shaw<sup>1,11,5\*‡</sup>

6

7           **Affiliations:**

8           <sup>1</sup> School of Electrical Engineering and Computer Science, The University of  
9           Queensland; Queensland, Australia

10          <sup>2</sup> Griffith School of Medicine and Dentistry, Queensland, Australia

11          <sup>3</sup> Neuroscience Research Australia, Sydney, NSW, Australia.

12          <sup>4</sup> Brain and Mind Centre, Faculty of Medicine and Health, University of Sydney, NSW

13          <sup>5</sup> Royal Brisbane and Women's Hospital, Herston; Queensland, Australia

14          <sup>6</sup> Australian Institute for Bioengineering and Nanotechnology, The University of  
15          Queensland, St Lucia; Queensland, Australia

16          <sup>7</sup> University of Queensland Centre for Clinical Research, Queensland, Australia

17          <sup>8</sup> School of Biomedical Sciences, The University of Queensland, St Lucia;  
18          Queensland, Australia

19          <sup>9</sup> Scientia Professor of Neuroscience, The University of NSW, and Department of  
20          Neurology, Southeastern Sydney Local Health District, Sydney, NSW, Australia.

21          <sup>10</sup> Queensland Digital Health Centre (QDHeC), The University of Queensland,  
22          Herston; Queensland, Australia

23          <sup>11</sup> Centre for Advanced Imaging, Australian Institute for Bioengineering and  
24          Nanotechnology, The University of Queensland, St Lucia; Queensland, Australia

25          <sup>12</sup> ARC Training Centre for Innovation in Biomedical Imaging and Technology (CIBIT),  
26          Centre for Advanced Imaging, The University of Queensland, St Lucia; Queensland,  
27          Australia

28

29          \* **Corresponding authors:** Fernanda L. Ribeiro ([fernanda.ribeiro@uq.edu.au](mailto:fernanda.ribeiro@uq.edu.au)),  
30          Thomas B. Shaw ([t.shaw@uq.edu.au](mailto:t.shaw@uq.edu.au))

31          ‡ **Senior author**

32 **Abstract**

33 This dataset provides the first fully annotated, openly available MRI-based imaging  
34 dataset for investigations of tongue musculature, including multi-contrast and multi-  
35 site MRI data from non-disease participants. The present dataset includes 47  
36 participants collated from three studies: BeLong (four participants; T2-weighted  
37 images), EATT4MND (19 participants; T2-weighted images), and BMC (24  
38 participants; T1-weighted images). We provide automatically generated and manually  
39 corrected segmentation of five key tongue muscles: the superior longitudinal,  
40 combined transverse/vertical, genioglossus, and inferior longitudinal muscles. Other  
41 phenotypic measures, including age, sex, weight, height, and tongue muscle volume,  
42 are also available for use. This dataset will benefit researchers across domains  
43 interested in the structure and function of the tongue in health and disease. For  
44 instance, researchers can use this data to train new machine learning models for  
45 tongue segmentation, which can be leveraged for segmentation and tracking of  
46 different tongue muscles engaged in speech formation in health and disease.  
47 Altogether, this dataset provides the means to the scientific community for  
48 investigation of the intricate tongue musculature and its role in physiological processes  
49 and speech production in health and disease.

50 **Keywords**

51 Tongue segmentation, tongue anatomy, atlas, MRI

## 52 **Background and Summary**

53 The human tongue is involved in many physiological processes<sup>1,2</sup> and speech  
54 production<sup>3</sup>. The tongue plays a crucial role in the manipulation and recognition of  
55 food<sup>1</sup> (e.g., food texture<sup>4</sup>), tasting<sup>2</sup> and thermosensation<sup>5,6</sup>, breathing<sup>7</sup>, and speech<sup>3,8</sup>.  
56 This diverse set of functionalities characterises the tongue as both a motor and a  
57 sensory organ<sup>2</sup>. Moreover, to subserve these processes, different tongue muscles  
58 may compress and/or elongate, but the overall tissue volume is constant, i.e., the  
59 tongue is a muscular hydrostat<sup>7</sup>. The tongue is also implicated in neurodegenerative  
60 diseases<sup>9,10</sup>, developmental speech pathologies<sup>11</sup>, and sleep disorders<sup>12</sup>, proving to  
61 be a potential marker for a wide range of diseases that implicate tongue function  
62 during speech, food processing, and breathing. For example, studies have found  
63 diffuse T1-weighted hyperintensity of the tongue musculature in Amyotrophic Lateral  
64 Sclerosis (ALS) patients<sup>13,14</sup> and reduced tongue volume in ALS patients with bulbar  
65 palsy<sup>15</sup>. Despite the potential of the measures of the tongue (e.g., morphometry and  
66 volume) as a biomarker, there exists no comprehensive annotated and publicly  
67 available MRI dataset to help inform understanding of tongue anatomy in health and  
68 in disease. We therefore introduce this critical resource that will enable the  
69 identification of new biomarkers and interventions.

70 The tongue is comprised of anatomically distinguishable and interconnected intrinsic  
71 and extrinsic muscles<sup>16,17</sup>. The intrinsic muscles of the tongue both originate and insert  
72 within the tongue itself. There are four pairs of these intrinsic muscles: the superior  
73 longitudinal, inferior longitudinal, transverse, and vertical muscles. In contrast, the  
74 extrinsic muscles originate from structures outside the tongue, including the  
75 genioglossus, hyoglossus, styloglossus, and palatoglossus muscles. Each of these  
76 muscles can move the tongue in a particular direction<sup>7</sup>, but coordinated contractions  
77 of multiple muscles work together to enable movements like protrusion, retraction, and  
78 elevation of the tongue, as well as changing its shape and position during activities  
79 such as chewing and swallowing<sup>18</sup>.

80 Magnetic resonance imaging (MRI) is an important non-invasive technique that allows  
81 for the imaging and identification of the intricate tongue musculature<sup>19</sup>. Accordingly, in  
82 our recent study<sup>20</sup>, we compiled a detailed guideline for the identification and  
83 segmentation of the superior longitudinal, transverse/vertical combined, genioglossus  
84 and inferior longitudinal muscles of the tongue. Although detailed manual annotation

85 was performed using T2-weighted (T2w) images—mostly from patients with motor  
86 neuron disease (MND)—where the contrast differences were clear across these  
87 different muscles, we developed a semi-automated segmentation pipeline for tongue  
88 segmentation of participants across different studies and MRI contrasts (T1-weighted  
89 (T1w) and T2-weighted images). Here we provide a subset of that data, i.e., the data  
90 from non-disease controls, to aid future research into the structure and function of the  
91 tongue in health and disease.

92 This is the first openly available fully annotated MRI-based imaging data for tongue  
93 segmentation. This dataset includes structural MRI data (T2w and/or T1w) from non-  
94 disease controls, with accompanying template space and demographic information,  
95 from three studies/scanners. Moreover, we provide automatically generated and  
96 manually corrected tongue segmentation labels, to aid segmentation model training in  
97 prospective studies. Finally, we also distribute an atlas generated with manually  
98 corrected segmentations to provide a more accurate model of tongue muscle location  
99 and size. This dataset will benefit researchers across domains interested in the  
100 structure and function of the tongue in health and disease. This data could aid machine  
101 learning model training for tongue segmentation, which can be leveraged for  
102 segmentation and tracking of different tongue muscle engagement in speech  
103 formation using high-speed real-time MRI (e.g., CINE)<sup>21,22</sup>. Similarly, these data can  
104 be used to inform longitudinal studies of disease progression, in which physiological  
105 functions of the tongue are implicated, e.g., bulbar onset ALS<sup>23</sup>. In sum, this new  
106 imaging/segmentation dataset of the human tongue provides the means to the  
107 scientific community for investigation of the intricate tongue musculature and its role  
108 in physiological processes and speech production in health and disease. Since the  
109 tongue is typically included in standard MRI scans of the brain and head/neck, the  
110 annotated data and atlas we provide here can serve as a helpful resource for analyzing  
111 both existing and future MRI datasets.

## 112 **Methods**

### 113 **Participants**

114 The present dataset includes information from 47 non-diseases “healthy” participants  
115 (20 females, 25-80 years old) collated from three studies: The Biomarkers of Long  
116 surviving MND (BeLong; 4 participants), Exploring Appetite Targets and Therapies for

117 Motor Neurone Disease (EATT4MND;19 participants), and the Brain and Mind Centre  
118 Motor Neuron Disease neuroimaging database (BMC; 24 participants). Table 1 shows  
119 basic demographic information across studies.

## 120 Ethics

121 All studies were approved by their relevant Human Research Ethics Committees.  
122 Specifically, BeLong was approved by the University of Queensland HREC  
123 (2021/HE000975), EATT4MND was approved by the University of Queensland HREC  
124 and Royal Brisbane and Women's Hospital (RBWH) HRECs (HREC/17/QRBW/616),  
125 and Uniting Care Health Human Research Ethics Committee (#1801), and the BMC  
126 dataset was approved by the University of Sydney HREC (2021/283). All participants  
127 provided written and informed consent.

128 **Table 1. Demographic information.**

| <i>Study</i>           | <i>Number of individuals<br/>(number of females)</i> | <i>Age range (years)</i> | <i>Weight/Height<br/>availability</i> |
|------------------------|------------------------------------------------------|--------------------------|---------------------------------------|
| <b><i>BE</i>Long</b>   | 4 (2)                                                | 25-74                    | Available                             |
| <b><i>EATT4MND</i></b> | 19 (5)                                               | 26-73                    | Available                             |
| <b><i>BMC</i></b>      | 24 (13)                                              | 37-80                    | Not available                         |

129

## 130 Image acquisition

131 **BeLong.** Data from the BeLong study were collected between 2020-2023 and include  
132 4 non-neurodegenerative healthy control (HC) participants. Control participants were  
133 recruited as a convenience sample of family, friends and colleagues of patients  
134 enrolled via the Motor Neurone Disease clinics at the Wesley Hospital and the RBWH.  
135 Imaging was performed at the University of Queensland, Centre for Advanced Imaging  
136 using a 3T Siemens Prisma (PrismaFit, Siemens Healthineers, Erlangen, Germany)  
137 using a 64-channel head and neck coil.

138 Participants were imaged using a 3D SPACE T2w sequence for spinal cord imaging  
139 covering the tongue with an isotropic resolution of 0.8mm<sup>3</sup>. This sequence shows high  
140 contrast of the tongue and surrounding tissue and was acquired with the following

141 parameters: TR=1500ms, TE=120ms, TA=4m:02s, FA=120°, matrix size=256x320,  
142 and number of slices=64.

143 **EATT4MND.** Participant information from the EATT4MND study has been described  
144 elsewhere<sup>24</sup>. Briefly, 24 HCs were imaged at the Herston Imaging Research Facility,  
145 of which 19 participants are included in our data repository. Control participants were  
146 recruited as in the BeLong study. Data were collected using a 3T Siemens Prisma  
147 (Siemens Healthcare, Erlangen, Germany). T2-weighted (T2w) scans were obtained  
148 from a 3D SPACE 1mm<sup>3</sup> isotropic sequence with the following parameters: TR =  
149 5000ms, TE = 386ms, TI = 1800ms, TA = 5m:52s, matrix size =256x256 and number  
150 of slices=176<sup>24</sup>.

151 **BMC.** Whole-brain imaging was performed using a 3T MRI scanner (GE MR750,  
152 DV29; 32-channel Nova head coil) at the Brain and Mind Centre (BMC), The University  
153 of Sydney, Australia. Imaging data from 25 HCs were collected, 24 participants are  
154 included in our repository. Healthy control participants were recruited via study  
155 advertisement flyers and word-of-mouth. All healthy participants were screened for  
156 medical history. Written consent was provided by all participants prior to  
157 commencement of any research activities. Coronal T1-weighted images were  
158 acquired using an 1mm<sup>3</sup> isotropic MPRAGE sequence (parameters: TE = 2.3ms, TR  
159 = 6.2ms; TI = 500ms, FA = 12°; matrix size = 256x256; number of slices = 204, TA =  
160 5m 31s).

## 161 **Semi-automated tongue segmentation**

162 **Stage 1 – Active learning.** To generate annotated data for segmentation model  
163 training, we initially manually annotated the BeLong dataset T2w images from healthy  
164 controls and MND patients. Specifically, three tongue volumes from three scans were  
165 manually annotated by XZ (Medical Principal House Officer with three years medical  
166 experience). These initially labelled data have been used in conjunction with MONAI  
167 Label<sup>25</sup> within the Slicer application<sup>26</sup> available on Neurodesk<sup>27</sup> to interactively  
168 annotate the BeLong study data and iteratively train a model for T2w MRI tongue  
169 muscle segmentation. MONAI Label is based on active learning, which is a strategy  
170 that starts off by training a segmentation model on limited annotated data, which is  
171 then used for selecting a new sample from a pool of unlabelled data that may be  
172 labelled to improve model's performance in the next iteration of model training. In this

173 context, sample selection is based on the model's uncertainty<sup>28</sup>. Using this framework,  
174 we trained a DynUNet model to segment five key tongue muscles: genioglossus,  
175 transverse and vertical muscles combined, superior longitudinal, and inferior  
176 longitudinal (Figure 1a), using default data augmentation strategies, including random  
177 flip and intensity scaling. In this iterative process, XZ, FLR (six years medical imaging  
178 experience), and TBS (ten years medical imaging experience) corrected and labelled  
179 9 additional scans with assistance from XY.

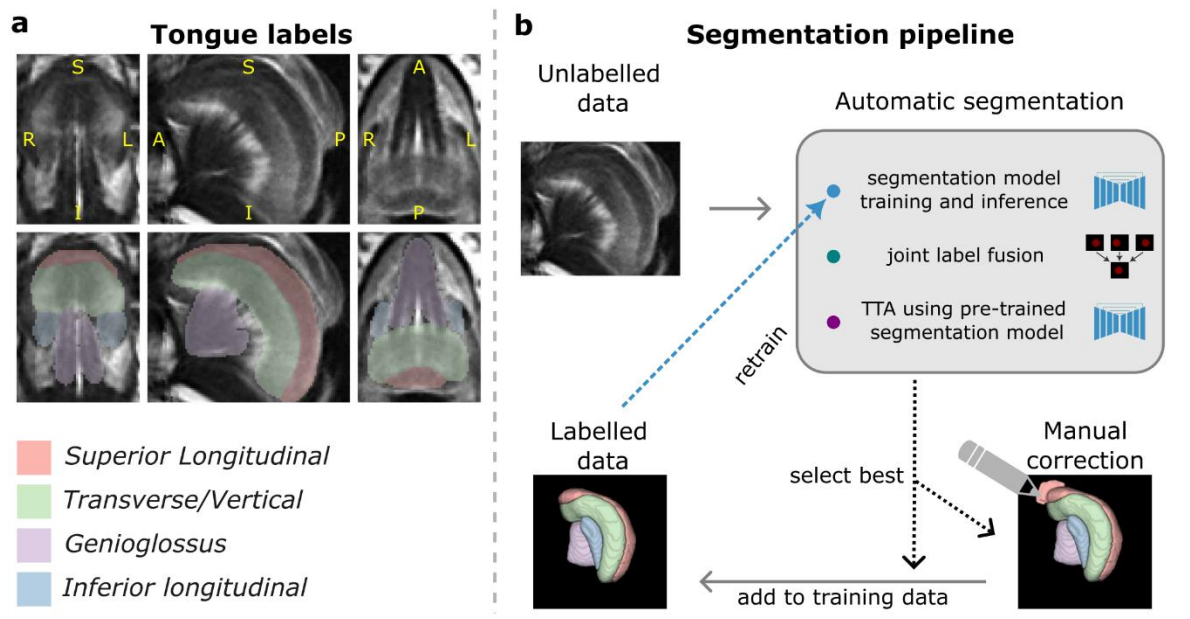

180

181 **Figure 1. Tongue segmentation method.** **a:** Atlas generated with Joint Label Fusion showing  
182 the labelled muscles and overlaid on the BeLong dataset template using T2w data. **b:** The  
183 segmentation pipeline: we gathered unlabelled data from each study and applied one of the  
184 three semi- or automatic segmentation methods to obtain rough segmentations. We then  
185 selected the best outputs by visual inspection, and either manually corrected the labels and/or  
186 added these data to our training for further segmentation model retraining. We then repeated  
187 this procedure until all data were labelled.

188 **Stage 2 – Segmentation model training and inference on new datasets.** After  
189 annotating and training on data from 12 individuals interactively and iteratively using  
190 MONAI Label, we used our own training implementation where data augmentation  
191 strategies were adjusted, and a new model was trained and used to predict tongue  
192 muscle segmentation on new unlabelled data. These initial predictions were further  
193 refined with manual correction (by FLR and TBS) and were leveraged with different  
194 approaches to speed up data annotation, including Joint Label Fusion (JLF)<sup>29</sup> and test-  
195 time adaptation (TTA)<sup>30,31</sup>. We performed a few iterations of model training and  
196 prediction on unlabelled data whenever we had more refined segmentations available.

197 This involved manually inspecting segmentations generated across all strategies and  
198 selecting the ones to be added to the training set in the next model training iteration  
199 (Figure 1b).

200 *Joint Label Fusion:* JLF<sup>29</sup> is a multi-atlas segmentation method that allows for  
201 combining a representative set of manually labelled datasets (or atlases) through data  
202 warping and weighted voting (label fusion). In detail, the technique involves non-  
203 linearly registering the atlases to the input image, then assigning a segmentation label  
204 to each voxel based on intensity similarities. Here, we used the 12 manually labelled  
205 data from Stage 1, which included both HC and patients' data. We used the ANTs  
206 implementation of JLF<sup>32,33</sup>. The JLF atlas was used to estimate segmentation in  
207 unlabelled data through image registration or as a proxy (suboptimal segmentation)  
208 for segmentation model adaptation.

209 *Test-time adaptation:* TTA refers to a strategy for improving deep learning model  
210 generalisability to new data that follows a different distribution than the original training  
211 data<sup>30,31</sup>. For example, a model pre-trained on T2w MRI data from the BeLong study  
212 performs poorly on data from different collection sites (EATT and Sydney) or of  
213 different contrast weightings (i.e. T1w). Here, we used TTA to adapt our previously  
214 pre-trained model using a model adapter (a smaller convolutional neural network  
215 prepended to the segmentation model), aiming to improve the predicted  
216 segmentations for T1w data and data from different studies. Note that only the  
217 parameters of the model adapter were trained while the segmentation model's  
218 parameters were fixed to retain the segmentation knowledge learned from the BeLong  
219 dataset. Specifically, to guide model adaptation in a supervised fashion, we leverage  
220 a proxy (or suboptimal) segmentation that consists of the JLF atlas registered to each  
221 individual's space. We performed instance-wise adaptation, i.e., the model adapter's  
222 parameters were adapted (or trained) for each individual separately.

223 **Stage 3 – Final manual correction.** Each of these approaches were used to grow  
224 the pool of annotated and manually corrected data for a new iteration of segmentation  
225 model training. We iteratively “bootstrapped” the best segmentation out of the three  
226 methodologies (using a pre-trained model, TTA, and JLF) to manually correct the  
227 segmentation if required (Figure 1b). The new labelled data were then used to train a  
228 new segmentation model for the following iteration. We repeated this process until all



229 data (HC and patient data) were segmented accurately, i.e., following segmentation  
230 landmarks according to our established method<sup>20</sup>. Our approach was intentionally  
231 multi-modal, as it was necessary to leverage the strengths of each method, given the  
232 variety of data (patient and control, different scanners, different MR contrasts). Finally,  
233 for the final release of HC data, FLR and TBS inspected, manually corrected, and  
234 smoothed all segmentations using a 1 mm gaussian smoothing kernel across all labels  
235 independently.

## 236 **Data records**

237 This dataset is deposited in the Open Science Framework (OSF), a free and open  
238 platform to support open research. The data can be accessed through this link:  
239 <https://osf.io/wt9fc/>. The files are organized per study, as shown in Figure 2.

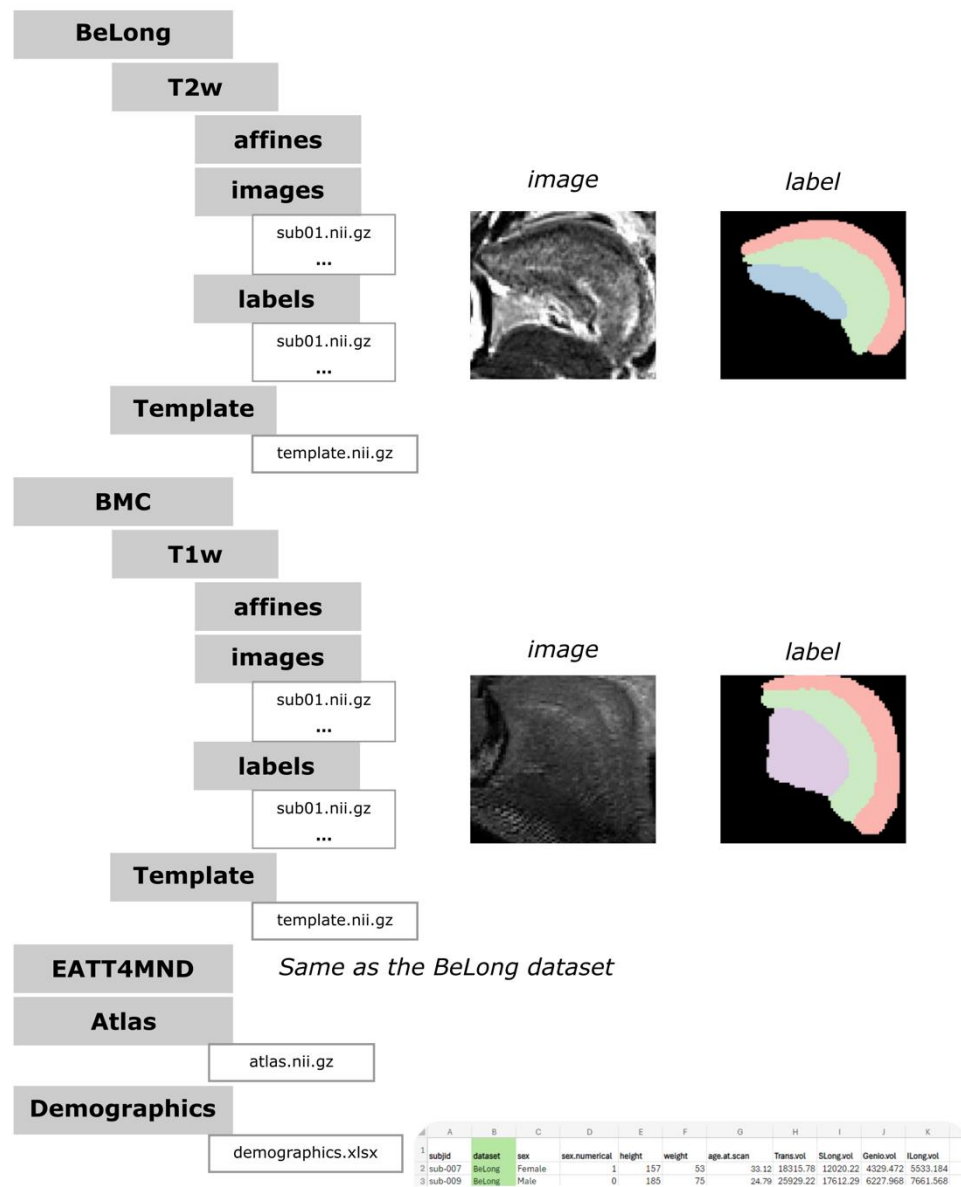

240

241 **Figure 2. Summary of the dataset.** The dataset is structured into distinct studies. For each  
 242 study we provide either T1w or T2w images with corresponding segmentations, and a study  
 243 template that can be used for new imaging data registration. We also provide an atlas  
 244 generated with Joint Label Fusion and demographic information.

245 *Imaging data:* Under each study directory are folders for cropped T1w or T2w data.  
 246 Within those folders, anatomical images are found in the images folder and  
 247 corresponding segmentations are found in the labels folder. Note that this data has  
 248 been registered to study templates generated as described below. Finally, to protect  
 249 the identity of the participants, we constrained the field of view of the anatomical data  
 250 to the mouth by cropping out data from elsewhere. The same transformation was  
 251 applied to the labels.

252 Also under each study directory is a folder for a template that can be used for  
253 registration of new imaging data, if required. These templates were generated using  
254 data from both HC and patients using *antsMultivariateTemplateConstruction2.sh* from  
255 ANTs<sup>32</sup>. Parameters were: 3 iterations using an affine template, 8 iterations using a  
256 refined SyN template at 0.25 gradient step, and 6 more iterations using refined SyN  
257 template at 0.15 gradient step.

258 *JLF atlas*: We provide a JLF atlas generated with manually corrected segmentation  
259 from the BMC study, which can be found under the Atlas folder. The JLF atlas can be  
260 used to estimate segmentation in new unlabelled data through image registration, for  
261 example, using ANTs<sup>32</sup> or the manual registration tool from ITK-SNAP<sup>34</sup>. Note that the  
262 provided atlas was generated with the final segmentations from the BMC study, i.e., it  
263 is not the same as the one described in the “Semi-automated tongue segmentation”  
264 section. The provided atlas was generated as described previously and with minimal  
265 manual correction of small mis-segmentations.

266 *Demographic information*: This dataset also includes demographic information (age,  
267 weight, height, and sex) and is available under the Demographics folder.

## 268 **Technical validation**

269 The quality of anatomical data has been evaluated by estimating signal-to-noise ratio  
270 (SNR) and contrast-to-noise ratio (CNR). SNR was calculated by first defining a noise  
271 region outside the brain and skull and dividing the mean intensity within the whole  
272 tongue musculature by the standard deviation of the noise region. CNR was calculated  
273 by subtracting the mean intensity value of the first tissue class (Transverse/Vertical)  
274 by the second tissue class (Superior Longitudinal), then dividing the result by the  
275 standard deviation of the noise region. All data processing was conducted using  
276 Nibabel<sup>35</sup> in Python. Both measures are available in the demographic information  
277 spreadsheet. We performed a 3x1 ANOVA to test differences in SNR and CNR  
278 (independently) across datasets. A highly significant difference in the SNR was  
279 observed across datasets,  $F(2, 43) = 8.979$ ,  $p < 0.001$ . Two-sample t-test revealed a  
280 significant difference in SNR between the EATT and Sydney datasets, with EATT  
281 showing higher SNR (64.36 vs. 23.08,  $p < 0.01$ ). As for CNR, a near-significant  
282 difference across datasets was observed,  $F(2, 43) = 2.904$ ,  $p = 0.0656$ , indicating a  
283 potential variation in contrast-to-noise ratio between datasets (mean CNR BeLong:

284 0.82, Sydney: 1.80, EATT: 4.23). We followed these with pairwise t-tests, which  
285 revealed a non-significant trend towards higher CNR in the EATT dataset compared  
286 to Sydney ( $p = 0.054$ ). No follow up tests were conducted for BeLong due to sample  
287 size (three with successful calculation).

288 We also performed ANOVAs to evaluate differences in age and muscle volumes  
289 across the three datasets. We found a significant difference in age of participants  
290 across dataset,  $F(2, 43) = 3.449$ ,  $p < 0.05$ . The post-hoc pairwise t-tests (with  
291 Bonferroni adjustment) revealed no significant differences between the specific  
292 datasets, though the small sample size and high variability in BeLong is likely driving  
293 this result. Finally, we did not find significant differences in muscle volume across  
294 datasets (Figure 3a). With aggregated data from all datasets (Figure 3b), we  
295 determined the correlation (Pearson's  $r$ ) between pairs of muscle's volumes (Figure  
296 3c), revealing different muscle volumes are generally well correlated with the  
297 exception of the genioglossus being less correlated with inferior longitudinal and  
298 transverse/vertical muscles.

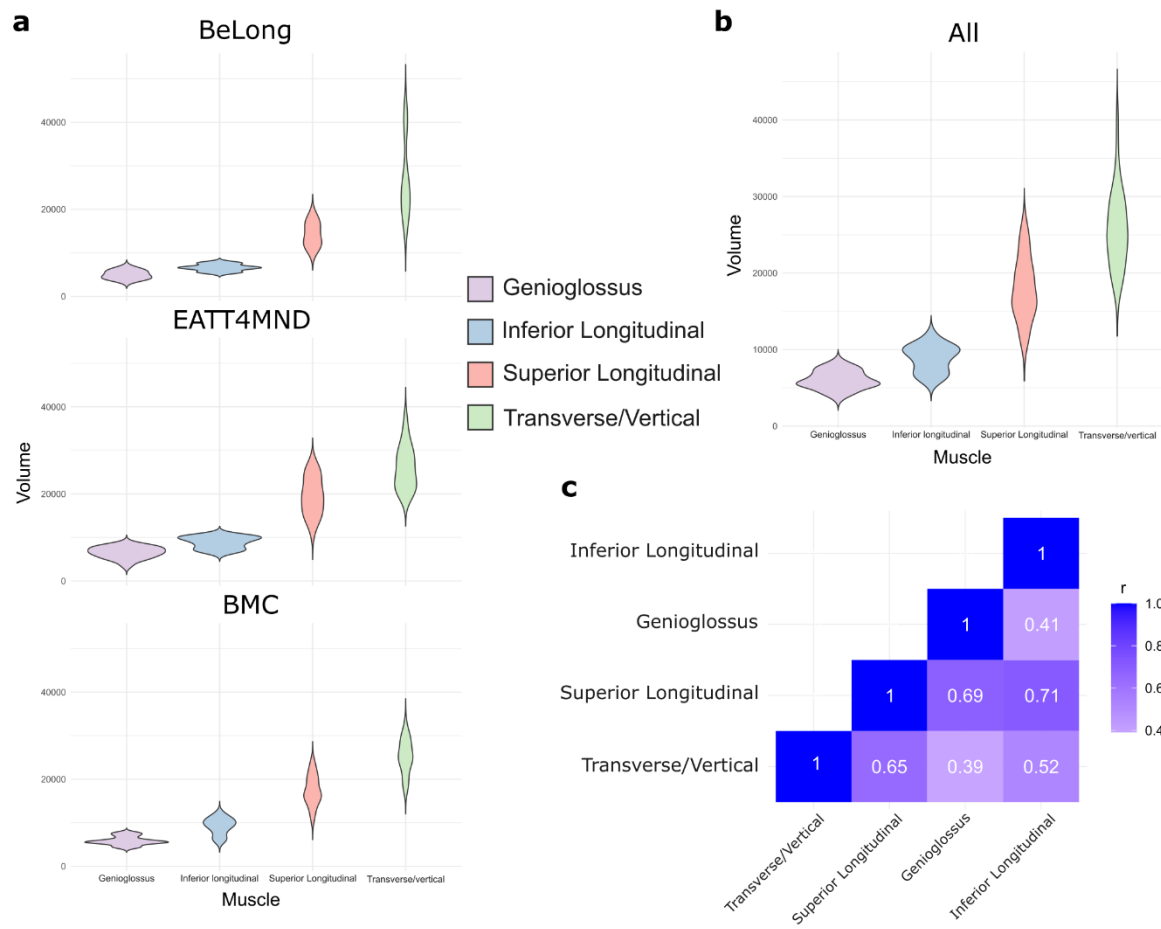

299

300 **Figure 3. Muscle volume distribution and correlation.** **a**, Distributions of tongue muscles'  
 301 volumes across datasets. **b**, Distributions of tongue muscles' volumes across all aggregated  
 302 data. **c**, Pair-wise correlation among inferior longitudinal, genioglossus, superior longitudinal,  
 303 and transverse/vertical muscles volumes using all data.

### 304 Code availability

305 All accompanying Python, R, and Bash source code is available on GitHub  
 306 (<https://github.com/thomshaw92/TongueSeqMND>).

### 307 Acknowledgement

308 The authors acknowledge funding by a Motor Neurone Disease Research Australia  
 309 (MNDRA) Postdoctoral Research Fellowship (PDF2112), NHMRC Ideas grant  
 310 APP202987, FightMND Collaborative Initiative Grant, Lenity Australia, and an ARC  
 311 Linkage grant (LP200301393). The data collection for EATT4MND was supported by  
 312 funding from the Wesley Medical Research grant (#2017-07) and the University of  
 313 Queensland, Faculty of Medicine. STN acknowledges funding from the Scott Sullivan

314 MND Research Fellowship (MND and Me Foundation, RBWH, and the University of  
315 Queensland).

316 We thank all participants for their contributions. We also thank the radiology and  
317 professional staff at the Herston Imaging Research Facility, National Imaging Facility,  
318 UQ Centre for Clinical Research, and the UQ Research Computing Centre. We also  
319 thank Dr Diana Lucia for their support in collecting data. We acknowledge support from  
320 Aiman Al Najjar, Nicole Atcheson, Sarah Daniel, and the Centre for Advanced  
321 Imaging.

## 322 **Author contribution**

323 **Fernanda L. Ribeiro:** Conceptualization, Methodology, Software, Validation, Formal  
324 analysis, Investigation, Data curation, Writing – Original Draft, Review & Editing,  
325 Supervision, Project administration, Visualization. **Xiangyun Zhu:** Methodology,  
326 Validation, Data curation, Writing – Review & Editing. **Xincheng Ye:** Methodology,  
327 Data curation, Writing – Review & Editing. **Sicong Tu:** Methodology, Resources, Data  
328 curation, Writing – Review & Editing, Funding acquisition. **Shyuan Ngo:** Resources,  
329 Writing – Review & Editing, Funding acquisition. **Robert Henderson:** Resources,  
330 Writing – Review & Editing, Funding acquisition. **Frederik Steyn:** Resources, Writing  
331 – Review & Editing, Funding acquisition. **Matthew Kiernan:** Funding acquisition.  
332 **Markus Barth:** Resources, Supervision, Writing – Review & Editing, Funding  
333 acquisition. **Steffen Bollmann:** Methodology, Writing – Review & Editing, Funding  
334 acquisition. **Thomas B. Shaw:** Conceptualization, Methodology, Software, Validation,  
335 Formal analysis, Investigation, Resources, Data curation, Writing – Original Draft,  
336 Review & Editing, Visualization, Supervision, Project administration, Funding  
337 acquisition.

## 338 **Competing interests**

339 The authors have nothing to declare.

## 340 **References**

341 1. Chen, J. Food oral processing—A review. *Food Hydrocolloids* **23**, 1–25 (2009).

- 342 2. Doyle, M. E., Premathilake, H. U., Yao, Q., Mazucanti, C. H. & Egan, J. M.  
343 Physiology of the tongue with emphasis on taste transduction. *Physiological*  
344 *Reviews* **103**, 1193–1246 (2023).
- 345 3. Ekström, A. G. & Edlund, J. Evolution of the human tongue and emergence of  
346 speech biomechanics. *Front. Psychol.* **14**, 1150778 (2023).
- 347 4. Okada, A., Honma, M., Nomura, S. & Yamada, Y. Oral behavior from food intake  
348 until terminal swallow. *Physiology & Behavior* **90**, 172–179 (2007).
- 349 5. Lemon, C. H. Tasting temperature: neural and behavioral responses to thermal  
350 stimulation of oral mucosa. *Current Opinion in Physiology* **20**, 16–22 (2021).
- 351 6. Manrique, S. & Zald, D. Individual differences in oral thermosensation. *Physiology*  
352 *& Behavior* **88**, 417–424 (2006).
- 353 7. Cheng, S., Butler, J. E., Gandevia, S. C. & Bilston, L. E. Movement of the tongue  
354 during normal breathing in awake healthy humans. *The Journal of Physiology* **586**,  
355 4283–4294 (2008).
- 356 8. Hiimae, K. M. & Palmer, J. B. Tongue movement in feeding and speech. *Critical*  
357 *Reviews in Oral Biology & Medicine* **14**, 413–429 (2003).
- 358 9. Northall, A. *et al.* An Automated Tongue Tracker for Quantifying Bulbar Function in  
359 ALS. *Front. Neurol.* **13**, 838191 (2022).
- 360 10. Hensiek, N. *et al.* Sonographic and 3T-MRI-based evaluation of the tongue in  
361 ALS. *NeuroImage: Clinical* **26**, 102233 (2020).
- 362 11. Potter, N. L., Nievergelt, Y. & VanDam, M. Tongue Strength in Children With  
363 and Without Speech Sound Disorders. *Am J Speech Lang Pathol* **28**, 612–622  
364 (2019).
- 365 12. Kim, A. M. *et al.* Tongue Fat and its Relationship to Obstructive Sleep Apnea.  
366 *Sleep* **37**, 1639–1648 (2014).

- 367 13. Fox, M. D. & Cohen, A. B. “Bright tongue sign” in ALS. *Neurology* **79**, 1520–  
368 1520 (2012).
- 369 14. Saxena, S., Tiwari, S., Khera, P. & Midha, N. Bright Tongue Sign in  
370 Amyotrophic Lateral Sclerosis. *Neurol India* **70**, 824 (2022).
- 371 15. Vernikouskaya, I., Müller, H.-P., Ludolph, A. C., Kassubek, J. & Rasche, V. AI-  
372 assisted automatic MRI-based tongue volume evaluation in motor neuron disease  
373 (MND). *Int J CARS* **19**, 1579–1587 (2024).
- 374 16. Abd-El-Malek, S. Observations on the morphology of the human tongue. *J Anat*  
375 **73 (Pt 2)**, (1939).
- 376 17. Mu, L. & Sanders, I. Human tongue neuroanatomy: Nerve supply and motor  
377 endplates. *Clinical Anatomy* **23**, 777–791 (2010).
- 378 18. Kayalioglu, M., Shcherbatyy, V., Seifi, A. & Liu, Z.-J. Roles of intrinsic and  
379 extrinsic tongue muscles in feeding: Electromyographic study in pigs. *Archives of*  
380 *Oral Biology* **52**, 786–796 (2007).
- 381 19. Stone, M. *et al.* Structure and variability in human tongue muscle anatomy.  
382 *Computer Methods in Biomechanics and Biomedical Engineering: Imaging &*  
383 *Visualization* **6**, 499–507 (2018).
- 384 20. Shaw, T. B. *et al.* Segmentation of the Human Tongue Musculature Using MRI:  
385 Field Guide and Validation in Motor Neuron Disease. Preprint at  
386 <https://doi.org/10.1101/2024.12.12.24318964> (2024).
- 387 21. Iltis, P. W. *et al.* High-speed real-time magnetic resonance imaging of fast  
388 tongue movements in elite horn players. *Quantitative Imaging in Medicine and*  
389 *Surgery* **5**, (2015).



- 390 22. Narayanan, S., Nayak, K., Lee, S., Sethy, A. & Byrd, D. An approach to real-  
391 time magnetic resonance imaging for speech production. *J. Acoust. Soc. Am.* **115**,  
392 1771–1776 (2004).
- 393 23. Kühnlein, P. *et al.* Diagnosis and treatment of bulbar symptoms in amyotrophic  
394 lateral sclerosis. *Nat Rev Neurol* **4**, 366–374 (2008).
- 395 24. Chang, J. *et al.* Lower hypothalamic volume with lower body mass index is  
396 associated with shorter survival in patients with amyotrophic lateral sclerosis. *Euro*  
397 *J of Neurology* **30**, 57–68 (2023).
- 398 25. Diaz-Pinto, A. *et al.* MONAI Label: A framework for AI-assisted Interactive  
399 Labeling of 3D Medical Images. Preprint at <http://arxiv.org/abs/2203.12362> (2022).
- 400 26. Kikinis, R., Pieper, S. D. & Vosburgh, K. G. 3D Slicer: A Platform for Subject-  
401 Specific Image Analysis, Visualization, and Clinical Support. in *Intraoperative*  
402 *Imaging and Image-Guided Therapy* (ed. Jolesz, F. A.) 277–289 (Springer New  
403 York, New York, NY, 2014). doi:10.1007/978-1-4614-7657-3\_19.
- 404 27. Renton, A. I. *et al.* Neurodesk: an accessible, flexible and portable data analysis  
405 environment for reproducible neuroimaging. *Nat Methods* (2024)  
406 doi:10.1038/s41592-023-02145-x.
- 407 28. Wang, G. *et al.* Aleatoric uncertainty estimation with test-time augmentation for  
408 medical image segmentation with convolutional neural networks. *Neurocomputing*  
409 **338**, 34–45 (2019).
- 410 29. Hongzhi Wang *et al.* Multi-Atlas Segmentation with Joint Label Fusion. *IEEE*  
411 *Trans. Pattern Anal. Mach. Intell.* **35**, 611–623 (2013).
- 412 30. Guo, J., Zhang, W., Sinclair, M., Rueckert, D. & Chen, C. Pay Attention to the  
413 Atlas: Atlas-Guided Test-Time Adaptation Method for Robust 3D Medical Image  
414 Segmentation. Preprint at <http://arxiv.org/abs/2307.00676> (2023).

- 415 31. Karani, N., Erdil, E., Chaitanya, K. & Konukoglu, E. Test-Time Adaptable Neural  
416 Networks for Robust Medical Image Segmentation. *Medical Image Analysis* **68**,  
417 101907 (2021).
- 418 32. Avants, B., Tustison, N. J. & Song, G. Advanced Normalization Tools: V1.0.  
419 *The Insight Journal* (2009) doi:10.54294/uvnhin.
- 420 33. Avants, B., Epstein, C., Grossman, M. & Gee, J. Symmetric diffeomorphic  
421 image registration with cross-correlation: Evaluating automated labeling of elderly  
422 and neurodegenerative brain. *Medical Image Analysis* **12**, 26–41 (2008).
- 423 34. Yushkevich, P. A. *et al.* User-guided 3D active contour segmentation of  
424 anatomical structures: Significantly improved efficiency and reliability. *NeuroImage*  
425 **31**, 1116–1128 (2006).
- 426 35. Brett, M. *et al.* nipy/nibabel: 5.2.1. Zenodo  
427 <https://doi.org/10.5281/ZENODO.10714563> (2024).  
428
